# Supplementary material for: Mantis shrimp identify an object by its shape rather than its color during visual recognition
Source: Oxford University Press journal article supplement (doi:10.1242/jeb.242256), 2021-03-18
Supplement: jeb242256supp.pdf [file jeb242256supp.pdf]

## SUPPLEMENTARY MATERIALS

**Table S1: Summary of statistical outcomes for all experimental tests.**

| Experiment                                        | Z        | P-value | Cohen's D | Correct Choices | N (total tests) |
|---------------------------------------------------|----------|---------|-----------|-----------------|-----------------|
| Shape Recognition Test (Chose correct shape)      | 1.976    | 0.048   | 0.91      | 14              | 19              |
| Color Recognition Test (Chose correct color)      | 0.934    | 0.35    | 0.41      | 13              | 21              |
| Conflicting Cues Test (Chose correct shape)       | 1.927    | 0.054   | 0.88      | 29              | 41              |
| Degree to which repeated measures explain results | $\chi^2$ |         | P-Value   |                 | N (individuals) |
| Shape Recognition Test*                           | 0        |         | 1         |                 | 12              |
| Color Recognition Test*                           | 0.6187   |         | 0.432     |                 | 13              |
| Conflicting Cues Test*                            | 1.4577   |         | 0.227     |                 | 15              |

\*Repeated measures do not significantly explain results.

**Table S2: The number of animals trained to each type of target per test.** Totals of animals trained to each color and each shape per test are also reported.

| Experiment        | Red Rectangle | Red Triangle | Green Rectangle | Green Triangle | All Rectangle | All Triangle | All Red | All Green |
|-------------------|---------------|--------------|-----------------|----------------|---------------|--------------|---------|-----------|
| Shape Recognition | 2             | 5            | 2               | 3              | 4             | 8            | 7       | 5         |
| Color Recognition | 3             | 5            | 1               | 4              | 4             | 9            | 8       | 5         |
| Conflicting Cues  | 4             | 3            | 3               | 5              | 7             | 8            | 7       | 8         |

**Table S3: The number of each choice made during tests for animals trained to targets of each shape or color per test.** The color or shape of the target an individual was trained to did not influence the choice the animal made during testing.

| Experiment        | Choice    | Rectangle | Triangle | Red | Green |
|-------------------|-----------|-----------|----------|-----|-------|
| Shape Recognition | Correct   | 7         | 7        | -   | -     |
|                   | Incorrect | 1         | 4        | -   | -     |
| Color Recognition | Correct   | -         | -        | 7   | 6     |
|                   | Incorrect | -         | -        | 6   | 2     |
| Conflicting Cues  | Shape     | 16        | 13       | -   | -     |
|                   | Color     | -         | -        | 6   | 6     |
